# Supplementary material for: Metagenomic analysis reveals a functional signature for biomass degradation by cecal microbiota in the leaf-eating flying squirrel (Petaurista alborufus lena)
Source: PubMed Central journal article supplement (PMC3527328; doi:10.1186/1471-2164-13-466), 2012-09-10

## Additional File 1.

Rarefaction curves of observed species (a) and Chao1 diversity (b)

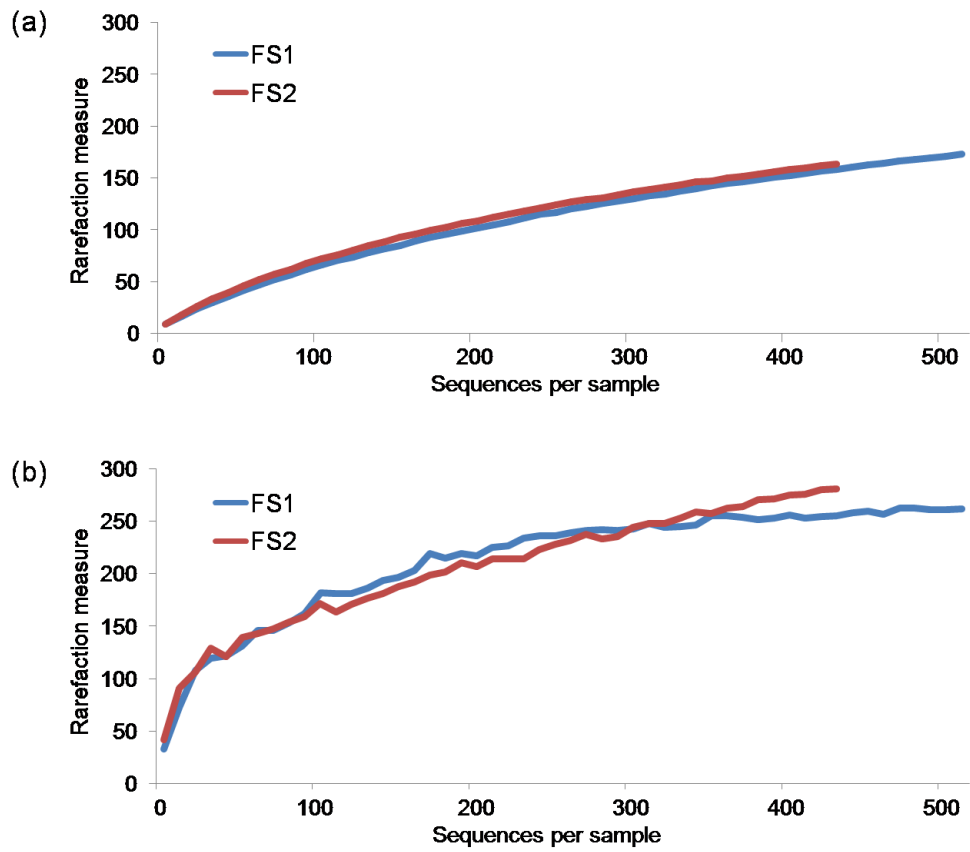

Supplement: 1471-2164-13-466-S1.pdf [file 1471-2164-13-466-S1.pdf]
