# Supplementary material for: Metagenomic analysis reveals a functional signature for biomass degradation by cecal microbiota in the leaf-eating flying squirrel (Petaurista alborufus lena)
Source: PubMed Central journal article supplement (PMC3527328; doi:10.1186/1471-2164-13-466), 2012-09-10

**Additional file 2.**

**Principal Coordinates Analysis (PCoA) based on the UniFrac metric comparing the phylogenetic composition of various gut microbiota.** FS1 and FS2 represent cecal microbiota of 2 flying squirrels; M1, M2, and M3 represent cecal microbiota of 3 mice [14]; C8, C64, and C71 represent rumen microbiota of 3 cattle [15].

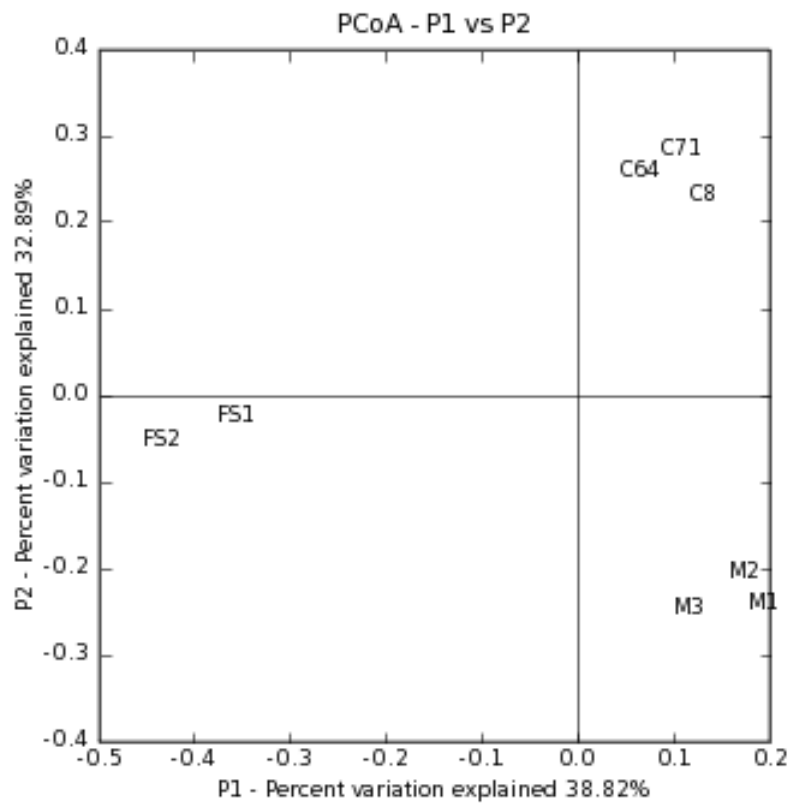

Supplement: 1471-2164-13-466-S2.pdf [file 1471-2164-13-466-S2.pdf]
