# Supplementary material for: Metagenomic analysis reveals a functional signature for biomass degradation by cecal microbiota in the leaf-eating flying squirrel (Petaurista alborufus lena)
Source: PubMed Central journal article supplement (PMC3527328; doi:10.1186/1471-2164-13-466), 2012-09-10
Supplement: 1471-2164-13-466-S3.pdf [file 1471-2164-13-466-S3.pdf]

### Additional file 3.

Functional categories of the cecal microbiota of the flying squirrel, according to the COG database.

| <b>Code and description of functional categories</b>             | <b>No. hits</b> | <b>(%)</b> |
|------------------------------------------------------------------|-----------------|------------|
| Information storage and processing                               | 760             | (17.86)    |
| L: Replication, recombination and repair                         | 268             | (6.29)     |
| J: Translation, ribosomal structure and biogenesis               | 253             | (5.94)     |
| K: Transcription                                                 | 230             | (5.41)     |
| A: RNA processing and modification                               | 6               | (0.13)     |
| B: Chromatin structure and dynamics                              | 4               | (0.09)     |
| Cellular processes and signaling                                 | 959             | (22.54)    |
| M: Cell wall                                                     | 289             | (6.79)     |
| T: Signal transduction mechanisms                                | 168             | (3.95)     |
| O: Posttranslational modification, protein turnover, chaperones  | 154             | (3.63)     |
| V: Defense mechanisms                                            | 142             | (3.34)     |
| U: Intracellular trafficking, secretion, and vesicular transport | 115             | (2.71)     |
| D: Cell cycle control, cell division, chromosome partitioning    | 55              | (1.29)     |
| N: Cell motility                                                 | 20              | (0.47)     |
| W: Extracellular structures                                      | 9               | (0.20)     |
| Z: Cytoskeleton                                                  | 7               | (0.16)     |
| Y: Nuclear structure                                             | 0               | (0.00)     |
| Metabolism                                                       | 1,375           | (32.32)    |
| E: Amino acid transport and metabolism                           | 299             | (7.02)     |
| C: Energy production and conversion                              | 287             | (6.75)     |
| P: Inorganic ion transport and metabolism                        | 219             | (5.14)     |
| G: Carbohydrate transport and metabolism                         | 177             | (4.15)     |
| H: Coenzyme transport and metabolism                             | 154             | (3.61)     |
| F: Nucleotide transport and metabolism                           | 123             | (2.88)     |
| I: Lipid transport and metabolism                                | 81              | (1.91)     |
| Q: Secondary metabolites biosynthesis, transport and catabolism  | 37              | (0.87)     |
| Poorly characterized                                             | 1,161           | (27.29)    |
| S: Function unknown                                              | 656             | (15.42)    |
| R: General function prediction only                              | 505             | (11.86)    |
