# Supplementary material for: Metagenomic analysis reveals a functional signature for biomass degradation by cecal microbiota in the leaf-eating flying squirrel (Petaurista alborufus lena)
Source: PubMed Central journal article supplement (PMC3527328; doi:10.1186/1471-2164-13-466), 2012-09-10
Supplement: 1471-2164-13-466-S4.pdf [file 1471-2164-13-466-S4.pdf]

#### Additional File 4.

Functional categories of the cecal microbiota of the flying squirrel, according to the KEGG database.

| <b>Code and description of functional categories</b> | <b>No. hits</b> | <b>(%)</b> |
|------------------------------------------------------|-----------------|------------|
| Metabolism                                           | 3,124           | (73.7)     |
| 1.1 Carbohydrate metabolism                          | 564             | (13.31)    |
| 1.2 Energy metabolism                                | 245             | (5.78)     |
| 1.3 Lipid metabolism                                 | 114             | (2.69)     |
| 1.4 Nucleotide metabolism                            | 255             | (6.02)     |
| 1.5 Amino acid metabolism                            | 554             | (13.07)    |
| 1.6 Metabolism of other amino acids                  | 93              | (2.19)     |
| 1.7 Glycan biosynthesis and metabolism               | 93              | (2.19)     |
| 1.8 Metabolism of cofactors and vitamins             | 179             | (4.22)     |
| 1.9 Metabolism of terpenoids and polyketides         | 70              | (1.65)     |
| 1.10 Biosynthesis of other secondary metabolites     | 63              | (1.49)     |
| 1.11 Xenobiotics biodegradation and metabolism       | 143             | (3.37)     |
| 1.12 Overview                                        | 751             | (17.72)    |
| Genetic information processing                       | 502             | (11.84)    |
| 2.1 Transcription                                    | 21              | (0.5)      |
| 2.2 Translation                                      | 146             | (3.44)     |
| 2.3 Folding, sorting and degradation                 | 103             | (2.43)     |
| 2.4 Replication and repair                           | 232             | (5.47)     |
| Environmental information processing                 | 346             | (8.16)     |
| 3.1 Membrane transport                               | 231             | (5.45)     |
| 3.2 Signal transduction                              | 108             | (2.55)     |
| 3.3 Signaling molecules and interaction              | 7               | (0.17)     |
| Cellular processes                                   | 122             | (2.88)     |
| 4.1 Transport and catabolism                         | 18              | (0.42)     |
| 4.2 Cell motility                                    | 28              | (0.66)     |
| 4.3 Cell growth and death                            | 70              | (1.65)     |
| 4.4 Cell communication                               | 6               | (0.14)     |
| Organismal systems                                   | 69              | (1.63)     |
| Human diseases                                       | 76              | (1.79)     |
