# Supplementary material for: Metagenomic analysis reveals a functional signature for biomass degradation by cecal microbiota in the leaf-eating flying squirrel (Petaurista alborufus lena)
Source: PubMed Central journal article supplement (PMC3527328; doi:10.1186/1471-2164-13-466), 2012-09-10
Supplement: 1471-2164-13-466-S5.pdf [file 1471-2164-13-466-S5.pdf]

1 **Additional File 5.**

2 Putative functions and taxonomic assignments of predicted ORFs of 2 fosmid inserts:

3 Scaffold\_56 (GenBank: JQ335997) and Scaffold\_90 (GenBank: JQ335998).

| ORF                | Putative function (COG category if available)                     | Closest relative (Organism / Phylum)             | Size (aa) | GC (%) |
|--------------------|-------------------------------------------------------------------|--------------------------------------------------|-----------|--------|
| <b>Scaffold_56</b> |                                                                   |                                                  |           |        |
| 1                  | Uncharacterized vancomycin resistance protein (V)                 | <i>Clostridium ramosum</i> / Firmicutes          | 417       | 63     |
| 2                  | Sigma 54 modulation protein / SSU ribosomal protein S30P (J)      | <i>Ruminococcaceae bacterium</i> / Firmicutes    | 48        | 63     |
| 3                  | Hypothetical protein                                              | No significant similarity found                  | 76        | 63     |
| 4                  | ATP-dependent metalloprotease FtsH (O)                            | <i>Ruminococcaceae bacterium</i> / Firmicutes    | 732       | 65     |
| 5                  | Tyrosine-tRNA ligase (J)                                          | <i>Subdoligranulum variabile</i> / Firmicutes    | 409       | 64     |
| 6                  | Integrase family protein (L)                                      | <i>Ruminococcaceae bacterium</i> / Firmicutes    | 134       | 58     |
| 7                  | Beta-glucosidase-related glycosidases (G)                         | <i>Roseburia intestinalis</i> / Firmicutes       | 810       | 60     |
| 8                  | Transcriptional regulator, TetR family (K)                        | <i>Clostridium acetobutylicum</i> / Firmicutes   | 191       | 50     |
| 9                  | Na <sup>+</sup> /melibiose symporter and related transporters (G) | <i>Marvinbryantia formatexigens</i> / Firmicutes | 195       | 54     |
| 10                 | Na <sup>+</sup> /melibiose symporter and related transporters (G) | <i>Marvinbryantia formatexigens</i> / Firmicutes | 365       | 59     |
| 11                 | Beta-glucosidase-related glycosidases (G)                         | <i>Ruminococcus torques</i> / Firmicutes         | 890       | 60     |
| 12                 | Beta-galactosidase / beta-glucuronidase (G)                       | <i>Marvinbryantia formatexigens</i> / Firmicutes | 771       | 60     |
| 13                 | L-arabinose isomerase (G)                                         | <i>Subdoligranulum variabile</i> / Firmicutes    | 111       | 53     |
| 14                 | Sugar (pentulose and hexulose) kinases (G)                        | <i>Roseburia intestinalis</i> / Firmicutes       | 512       | 64     |
| 15                 | Toxin-antitoxin system, toxin component, PIN family (R)           | <i>Eubacterium saepenum</i> / Firmicutes         | 137       | 47     |
| 16                 | Addiction module antitoxin, RelB/DinJ family (L)                  | <i>Butyrivibrio fibrisolvens</i> / Firmicutes    | 94        | 48     |
| 17                 | Transposase, IS4 family (L)                                       | <i>Ruminococcus albus</i> / Firmicutes           | 472       | 53     |
| 18                 | Transposase, IS4 family (L)                                       | <i>Ruminococcus albus</i> / Firmicutes           | 430       | 53     |
| 19                 | SH3 domain protein (T)                                            | <i>Clostridium cellulolyticum</i> / Firmicutes   | 264       | 65     |
| 20                 | Hypothetical protein                                              | No significant similarity found                  | 77        | 65     |
| 21                 | Conserved hypothetical protein                                    | <i>Ruminococcaceae bacterium</i> / Firmicutes    | 78        | 61     |
| 22                 | Hypothetical protein                                              | No significant similarity found                  | 32        | 60     |
| 23                 | IS186 transposase (L)                                             | <i>Escherichia coli</i> / Proteobacteria         | 371       | 52     |
| 24                 | Hypothetical protein                                              | No significant similarity found                  | 62        | 62     |
| 25                 | Hypothetical protein                                              | No significant similarity found                  | 72        | 66     |
| 26                 | Conserved hypothetical protein (S)                                | <i>Eubacterium dolichum</i> / Firmicutes         | 992       | 59     |
| 27                 | Prophage protein (R)                                              | <i>Coprobacillus sp.</i> / Firmicutes            | 364       | 65     |
| 28                 | Prophage protein (S)                                              | <i>Coprobacillus sp.</i> / Firmicutes            | 213       | 63     |
| <b>Scaffold_90</b> |                                                                   |                                                  |           |        |
| 1                  | Branched-chain amino acid transporter AzIC (E)                    | <i>Eubacterium yurii</i> / Firmicutes            | 58        | 47     |
| 2                  | NAD-dependent protein deacetylases, SIR2 family (K)               | <i>Ruminococcus albus</i> / Firmicutes           | 286       | 47     |
| 3                  | Conserved hypothetical protein (R)                                | <i>Jonquetella anthropi</i> / Synergistetes      | 98        | 43     |
| 4                  | Nitroreductase (C)                                                | <i>Ruminococcus sp.</i> / Firmicutes             | 195       | 51     |
| 5                  | NADPH:quinone reductase / Zn-dependent oxidoreductases (C)        | <i>Synergistetes bacterium</i> / Synergistetes   | 334       | 51     |
| 6                  | Predicted Fe-S oxidoreductases (R)                                | <i>Bacteroides pectinophilus</i> / Bacteroidetes | 328       | 50     |
| 7                  | Hypothetical protein                                              | No significant similarity found                  | 48        | 59     |
| 8                  | Transcriptional regulator, HxIR family (K)                        | <i>Butyrivibrio proteoclasticus</i> / Firmicutes | 111       | 44     |
| 9                  | Beta-glucosidase-related glycosidases (G)                         | <i>Cellulosilyticum ruminicola</i> / Firmicutes  | 835       | 51     |
| 10                 | Na <sup>+</sup> /melibiose symporter and related transporters (G) | <i>Marvinbryantia formatexigens</i> / Firmicutes | 469       | 47     |
| 11                 | Transcriptional regulator, AraC family (K)                        | <i>Marvinbryantia formatexigens</i> / Firmicutes | 412       | 44     |
| 12                 | Conserved hypothetical protein (S)                                | <i>Bacteroides capillosus</i> / Bacteroidetes    | 207       | 48     |
| 13                 | Putative chlorophyll synthesis pathway, BchC (E)                  | <i>Clostridium hathewayi</i> / Firmicutes        | 338       | 52     |
| 14                 | Transcriptional regulator, TetR family (K)                        | <i>Clostridium hathewayi</i> / Firmicutes        | 197       | 48     |
| 15                 | Hypothetical protein                                              | No significant similarity found                  | 75        | 54     |
| 16                 | Hypothetical protein                                              | No significant similarity found                  | 103       | 44     |
| 17                 | Conserved hypothetical protein (S)                                | <i>Butyrivibrio proteoclasticus</i> / Firmicutes | 488       | 46     |
| 18                 | Conserved hypothetical protein (S)                                | <i>Roseburia inulinivorans</i> / Firmicutes      | 176       | 47     |
| 19                 | Conserved hypothetical protein (S)                                | <i>Holdemanella filiformis</i> / Firmicutes      | 399       | 48     |
| 20                 | Conserved hypothetical protein (S)                                | <i>Clostridiales bacterium</i> / Firmicutes      | 366       | 42     |
| 21                 | NADH-dependent butanol dehydrogenase A, Fe-dependent (C)          | <i>Clostridium methylpentosum</i> / Firmicutes   | 396       | 56     |
| 22                 | Integrase family protein (L)                                      | <i>Clostridium scindens</i> / Firmicutes         | 411       | 48     |
| 23                 | Integrase family protein (L)                                      | <i>Desulfotomaculum acetoxidans</i> / Firmicutes | 324       | 50     |
| 24                 | Integrase family protein (L)                                      | <i>Desulfotomaculum acetoxidans</i> / Firmicutes | 348       | 47     |
| 25                 | 4-carboxymuconolactone decarboxylase (S)                          | <i>Marvinbryantia formatexigens</i> / Firmicutes | 264       | 50     |
| 26                 | Transcriptional regulator, MerR family (K)                        | <i>Clostridium methylpentosum</i> / Firmicutes   | 133       | 51     |
| 27                 | Conserved hypothetical protein                                    | <i>Biifidobacterium breve</i> / Actinobacteria   | 203       | 48     |
| 28                 | Beta-glucosidase-related glycosidases (G)                         | <i>Ruminococcus gnavus</i> / Firmicutes          | 619       | 56     |
| 29                 | Beta-glucosidase-related glycosidases (G)                         | <i>Marvinbryantia formatexigens</i> / Firmicutes | 221       | 55     |
| 30                 | Beta-glucosidase-related glycosidases (G)                         | <i>Marvinbryantia formatexigens</i> / Firmicutes | 1076      | 54     |
| 31                 | Conserved hypothetical protein                                    | <i>Marvinbryantia formatexigens</i> / Firmicutes | 436       | 45     |
| 32                 | Response regulator of the LysR/AlgR family (K)                    | <i>Marvinbryantia formatexigens</i> / Firmicutes | 97        | 46     |

4

5
